# Supplementary material
Source: PubMed Central journal article supplement (PMC5816177)
Supplement: pnas.201716801SI.pdf [file pnas.201716801SI.pdf]

# Supporting Information

Bulgari et al. 10.1073/pnas.1716801115

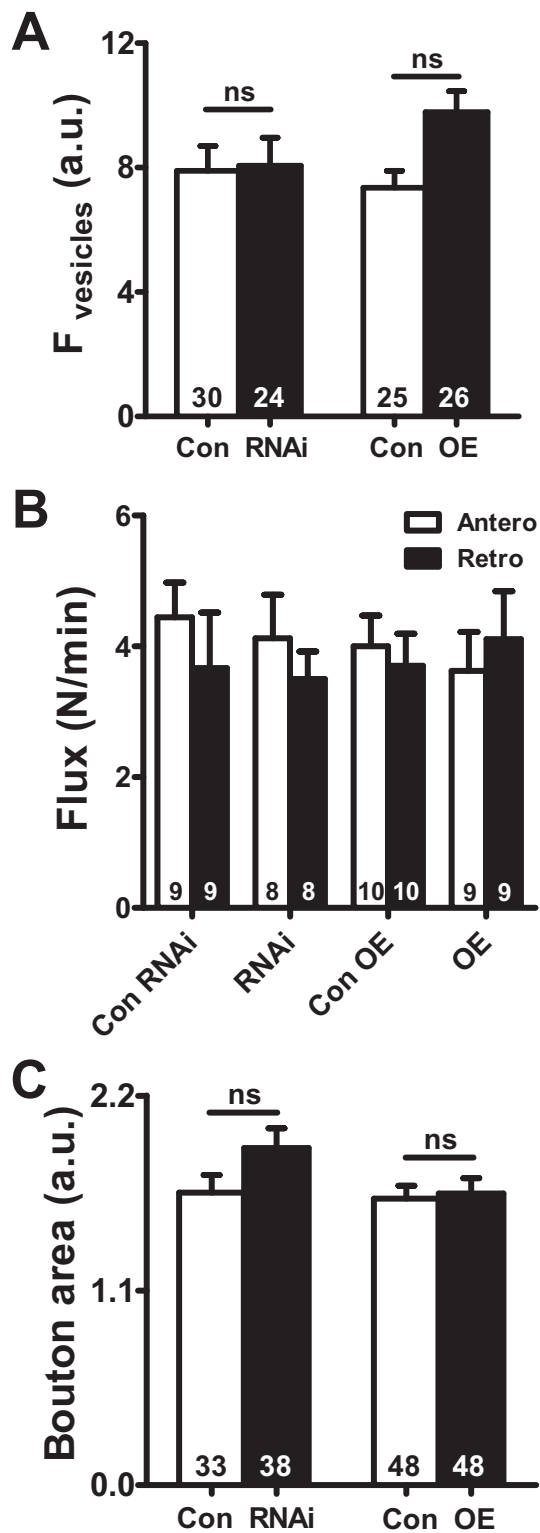

**Fig. S1.** Myopic does not affect DCV content, transport, or bouton size. (A) DCV fluorescence is not altered by Myopic RNAi knockdown (RNAi; no. 34085) or overexpression (OE) ( $n = 5$  animals). (B) DCV flux is not altered by RNAi (no. 34085) or OE of Myopic. Five animals were used for each group. (C) Bouton area is not changed in Myopic RNAi (no. 34085; seven animals) or OE (nine animals) NMJs. Numbers on the bars represents the number of boutons examined. Tests showed that there were no significant changes. ns, not significant.
